# Supplementary material
Source: Research Square preprint supplement (doi:10.21203/rs.3.rs-8872745/v1)
Supplement: Supplementary file 1 [file 0c13513cae0f40736c0034be.docx]

**Supplementary**

**Table 1. Antibodies and Reagents Used in the Study**

| Target Protein | Antibody Name/Clone | Host Species | Manufacturer | Catalog Number | Application | Dilution |
| --- | --- | --- | --- | --- | --- | --- |
| Topo IIβ | Topo IIβ | Mouse | BD Bioscience | 611492 | IHC | 1:100 |
| Topo IIβ | Anti-Topo IIβ | Rabbit | Abcam | ab125297 | WB | 1:1000 |
| Nurr1 | Nurr1 | Rabbit | Invitrogen | PA5-13416 | IHC | 1:50 |
| Nurr1 | Nurr1 | Rabbit | Invitrogen | PA5-13416 | WB | 1:1000 |
| NF-κB (p65) | NF-κB p65 (D14E12) | Rabbit | Cell Signaling Tech. | 8242 | IHC | 1:400 |
| NF-κB (p65) | NF-κB p65 (D14E12) | Rabbit | Cell Signaling Tech. | 8242 | WB | 1:1000 |
| NeuN | NeuN (D4G4O) | Rabbit | Cell Signaling Tech. | 24307 | IHC | 1:400 |
| GAPDH | GAPDH (14C10) | Rabbit | Cell Signaling Tech. | 3670 | WB | 1:7500 |
| Α-Synuclein | Phospho-α-Synuclein (Ser129) | Rabbit | Cell Signaling | 23706 | IHC | 1:100 |
| Α-Synuclein | Phospho-α-Synuclein (Ser129) | Rabbit | Cell Signaling | 23706 | WB | 1:1000 |
| Secondary Ab | GAR IgG, HRP-linked | Goat | Abcam | ab97080 | WB | 1:5000 |
| Secondary Ab | GAM IgG, HRP preadsorbed | Goat | Abcam | ab97040 | WB | 1:5000 |
