# Supplementary material
Source: Research Square preprint supplement (doi:10.21203/rs.3.rs-8872745/v1)
Supplement: Supplementary file 2 [file a59448b22aa0b0649a97dc67.xlsx]

## Sheet: Microplate End point
User: USER
Path: C:\Program Files (x86)\BMG\Omega\User\Data
Test ID: 2215
Test Name: BCA
Date: 20.11.2024
Time: 14:45:33
Absorbance			Absorbance values are displayed as OD
	1. Raw Data (480)
	1	2	3	4	5	6	7	8	9	10	11	12
A	1.326	1.447	0.981	0.772	0.714	0.577	0.53	0.463	0.455
B	0.753	0.605	0.571	0.572	0.55	0.596	0.547	0.573
C
D
E
F
G
H
	2. Concentration
	1	2	3	4	5	6	7	8	9	10	11	12
A	1.708	1.946	1.025	0.612	0.497	0.226	0.134	0.002
B	0.574	0.282	0.214	0.216	0.174	0.264	0.168	0.22
C
D
E
F
G
H
	3. Blank corrected based on Raw Data (480)
	1	2	3	4	5	6	7	8	9	10	11	12		Average of all blanks used
A	0.871	0.992	0.526	0.317	0.258	0.121	0.074	0.008
B	0.298	0.149	0.115	0.116	0.095	0.14	0.092	0.118						Used correction value(s):
C														Blank 0,4553
D
E
F
G
H

## Sheet: Table End point
User: USER
Path: C:\Program Files (x86)\BMG\Omega\User\Data
Test ID: 2215
Test Name: BCA
Date: 20.11.2024
Time: 14:45:33
Absorbance			Absorbance values are displayed as OD
	R²	0.91787	0.991272	0.992485
Well	Content	Concentration	Concentration	Concentration
A01	Standard S1	1.708	1.916	1.957
A02	Standard S2	1.946	1.51	1.461
A03	Standard S3	1.025	1.116	1.14
A04	Standard S4	0.612	0.794	0.754
A05	Standard S5	0.497	0.515	0.512
A06	Standard S6	0.226	0.263	0.244
A07	Standard S7	0.134	0.085	0.103
A08	Standard S8	0.002	-0.049	-0.022
A09	Blank B				Average	x50	For 35ug	For 50ug	For 50ug*2.5	LB + bMe	dH2O	Total
B01	P4/20	0.574	0.457	0.435	0.446	22.3	1.56951	2.24215	5.60538	6.25	13.1446	25
B02	p9/15	0.282	0.257	0.241	0.249	12.45	2.81124	4.01606	10.0402	6.25	8.70984	25
B03	p17/16	0.214	0.259	0.243	0.251	12.55	2.78884	3.98406	9.96016	6.25	8.78984	25
B04	p24/17	0.216	0.363	0.352	0.3575	17.875	1.95804	2.7972	6.99301	6.25	11.757	25
B05	p32/02	0.174	0.247	0.263	0.255	12.75	2.7451	3.92157	9.80392	6.25	8.94608	25
B06	p40/17	0.264	0.337	0.304	0.3205	16.025	2.18409	3.12012	7.80031	6.25	10.9497	25
B07	p50/18	0.168	0.278	0.255	0.2665	13.325	2.62664	3.75235	9.38086	6.25	9.36914	25
B08	p67/10	0.22	0.33	0.333	0.3315	16.575	2.11161	3.01659	7.54148	6.25	11.2085	25
									0	50
									Prepare 55	Add %10 bMe	5.5

## Sheet: Antibodies
Antibodies	Concentration	Storage	Catalog No	Company	Clonality	Host	Reactivity	Size	Applications
Topo II beta	50 µg at 250 µg/ml	.-20° C	611492	BD	Monoclonal	Mouse	H	180 kDa	WB, IF
Nurr1	400ul at 2 mg/mL	.-20° C	PA513416	Invitrogen	Polyclonal	Rabbit	H, M	70 kDa	WB, IHC (P), ICC/IF	WB 1:1000, IHC (P) 1:50-1:100, ICC/IF 1:10-1:50
NF-κB p65 XP®		.-20° C	8242	Cell Signaling	Monoclonal	Rabbit	H, M, R	65 kDa	WB, IP, IHC-P, IF-IC, Flow, ChIP, ChIP-seq, Cut&Run
Phospho-NF-κB p65 (Ser536)		.-20° C	3033	Cell Signaling	Monoclonal	Rabbit	H, M, R	65 kDa	WB, IP, IF, Flow
NeuN XP®		.-20° C	24307	Cell Signaling	Monoclonal	Rabbit	H, M, R	46-55 kDa	WB, IHC, IF
Actin	100ul	.-20° C	M01263	Boster	Monoclonal	Rabbit	H, M, R	42 kDa	WB, IF, IHC, ICC
GAPDH		.-20° C	M00227-7	Boster	Monoclonal	Mouse	H, M, R	37 kDa	WB, IF, IHC, ICC, Flow Cytometry, IP	WB 1:5000-1:20000, IHC 1:100-1:500, ICC/IF 1:100-1:250, IP 1:50, FC 1:50
Phospho-α-Synuclein (Ser129)		.-20° C	23706	Cell Signaling	Monoclonal	Rabbit	H, M, R	18 kDa	WB, IP, IF

## Sheet: Linear regression fit
User: USER
Path: C:\Program Files (x86)\BMG\Omega\User\Data
Test ID: 2215
Test Name: BCA
Date: 20.11.2024
Time: 14:45:33
Absorbance			Absorbance values are displayed as OD
Formula:	Y = Slope * x + Offset
Wavelength:	Slope	0.505905
Concentration	Offset	0.00696027
	R	0.958055
	R²	0.91787

## Sheet: Protocol Information
User: USER
Path: C:\Program Files (x86)\BMG\Omega\User\Data
Test ID: 2215
Test Name: BCA
Date: 20.11.2024
Time: 14:45:33
Absorbance
Basic settings
Measurement type:	Absorbance
Microplate name:	SBS STANDARD 96
Endpoint settings
No. of flashes per well:	22
Optic settings
Excitation:	480
Shaking settings
Shaking 1
Shake:	before plate reading
Movement:	double orbital
Frequency [rpm]:	300
Time [s]:	15
General settings
Top optic used
Measurement head:	- (Spectrometer)
Settling time [s]:	0.5
Reading direction:	bidirectional, horizontal left to right, top to bottom
Target temperature [°C]:	set off
Comment
	Endpoint concentration measurement of protein dyed with bicinchoninic acid - measure at 562
